# Supplementary material for: The influence of azide and imidazole on the properties of Mn- and Cd-based networks: conductivity and nonlinear phenomena
Source: Royal Society of Chemistry journal article supplement (doi:10.1039/d4tc02745k), 2024-01-01
Supplement: d4tc02745k1.pdf [file d4tc02745k1.pdf]

## Influence of azide and imidazole on the properties of Mn- and Cd-based networks: conductivity and nonlinear phenomena

Monika Trzebiatowska<sup>1\*</sup>, Dorota A. Kowalska<sup>1</sup>, Agnieszka Ciżman<sup>2</sup>, Natalia A. Wójcik<sup>3,4</sup>, Ryszard J. Barczyński<sup>3</sup>, Adam Pikul<sup>1</sup>, Jan K. Zaręba<sup>5</sup>, Marcin Palewicz<sup>6</sup>, Tomasz Piasecki<sup>6</sup>, Krystian Roleder<sup>7</sup>, Marek Gusowski<sup>2</sup>, Mirosław Mączka<sup>1</sup>

<sup>1</sup> Institute of Low Temperature and Structure Research, Polish Academy of Sciences, Okólna 2, 50-422 Wrocław, Poland

<sup>2</sup> Department of Experimental Physics, Wrocław University of Science and Technology, 27 Wybrzeże Wyspiańskiego, 50-370 Wrocław, Poland

<sup>3</sup> Advanced Materials Center, Institute of Nanotechnology and Materials Engineering, Gdansk University of Technology, Narutowicza 11/12, 80-233 Gdansk

<sup>4</sup> Department of Built Environment and Energy Technology, Linnaeus University, 35195 Växjö, Sweden

<sup>5</sup> Institute of Advanced Materials, Wrocław University of Science and Technology, Wybrzeże Wyspiańskiego 27, 50-370, Wrocław, Poland

<sup>6</sup> Department of Nanometrology, Faculty of Electronics, Photonics and Microsystem, Wrocław University of Science and Technology, Janiszewskiego 11/17, 50-372 Wrocław, Poland

<sup>7</sup> Institute of Physics, University of Silesia, ul. 75 Pułku Piechoty 1, 41-500 Chorzów, Poland

\*corresponding author: [m.trzebiatowska@intibs.pl](mailto:m.trzebiatowska@intibs.pl)

CCDC 2179921 –2179924 and CCDC 2287914 contain the supplementary crystallographic data for this paper.

**Table S1.** Selected bond lengths (Å) and angles (°).

|      | Bond                  | (Å)      | Bond  | (Å)      | Angle                                   | (°)      | Angle                                    | (°)      |
|------|-----------------------|----------|-------|----------|-----------------------------------------|----------|------------------------------------------|----------|
| Cd-1 | Cd1—N1                | 2.417(4) | N8—C1 | 1.322(7) | N1—Cd1—N4                               | 90.2(2)  | N1—Cd1—N7                                | 169.0(2) |
|      | Cd1—N4                | 2.332(4) | N8—C3 | 1.342(8) | N1—Cd1—N4 <sup>i</sup>                  | 90.0(2)  | N4—Cd1—N1 <sup>ii</sup>                  | 169.3(2) |
|      | Cd1—N4 <sup>i</sup>   | 2.343(4) | C2—C3 | 1.360(8) | N1—Cd1—N1 <sup>ii</sup>                 | 79.1(2)  | N4 <sup>i</sup> —Cd1—N1 <sup>iii</sup>   | 168.8(2) |
|      | Cd1—N1 <sup>ii</sup>  | 2.471(4) |       |          | N1—Cd1—N1 <sup>iii</sup>                | 79.1(2)  | Cd1—N1—Cd1 <sup>iii</sup>                | 100.9(2) |
|      | Cd1—N1 <sup>iii</sup> | 2.419(4) |       |          | N4—Cd1—N4 <sup>i</sup>                  | 101.9(2) | Cd1—N1—Cd1 <sup>ii</sup>                 | 100.9(2) |
|      | Cd1—N7                | 2.242(4) |       |          | N4—Cd1—N1 <sup>iii</sup>                | 80.8(2)  | Cd1 <sup>iii</sup> —N1—Cd1 <sup>ii</sup> | 95.8(2)  |
|      | N1—N2                 | 1.217(5) |       |          | N4 <sup>i</sup> —Cd1—N1 <sup>ii</sup>   | 79.5(2)  | Cd1—N4—Cd1 <sup>iv</sup>                 | 101.9(2) |
|      | N2—N3                 | 1.138(6) |       |          | N1 <sup>ii</sup> —Cd1—N1 <sup>iii</sup> | 95.8(2)  | N2—N1—Cd1                                | 116.0(3) |
|      | N4—N5                 | 1.192(6) |       |          | N7—Cd1—N4                               | 99.4(2)  | N5—N4—Cd1                                | 127.7(3) |
|      | N5—N6                 | 1.148(6) |       |          | N7—Cd1—N4 <sup>i</sup>                  | 93.3(2)  | N1—N2—N3                                 | 178.6(5) |
|      | N7—C1                 | 1.315(6) |       |          | N7—Cd1—N1 <sup>ii</sup>                 | 91.2(2)  | N4—N5—N6                                 | 178.3(5) |
|      | N7—C2                 | 1.368(6) |       |          | N7—Cd1—N1 <sup>iii</sup>                | 97.0(2)  |                                          |          |

Symmetry codes: (i)  $x-1, y, z$ ; (ii)  $-x, -y+1, -z+1$ ; (iii)  $-x+1, -y+1, -z+1$ ; (iv)  $x+1, y, z$ .

|             |                      |           |        |         |                                       |         |                          |           |
|-------------|----------------------|-----------|--------|---------|---------------------------------------|---------|--------------------------|-----------|
|             | Cd1—N1               | 2.338(10) | N8—C5  | 1.35(2) | N1—Cd1—N4                             | 89.1(4) | N1—Cd1—N3 <sup>i</sup>   | 173.2(4)  |
|             | Cd1—N3 <sup>i</sup>  | 2.441(11) | C5—C6  | 1.35(2) | N3 <sup>i</sup> —Cd1—N4               | 84.3(4) | N4—Cd1—N6 <sup>ii</sup>  | 174.6(5)  |
|             | Cd1—N4               | 2.443(11) | N9—C1  | 1.27(3) | N6 <sup>ii</sup> —Cd1—N1              | 94.6(4) | N7—Cd1—N9                | 176.9(15) |
|             | Cd1—N6 <sup>ii</sup> | 2.335(11) | N9—C3  | 1.34(3) | N6 <sup>ii</sup> —Cd1—N3 <sup>i</sup> | 92.1(4) | C4—N7—Cd1                | 131.1(18) |
|             | Cd1—N7               | 2.19(4)   | N10—C1 | 1.32(2) | N7—Cd1—N1                             | 89.6(6) | C6—N7—Cd1                | 130(2)    |
|             | Cd1—N9               | 2.33(4)   | N10—C2 | 1.34(2) | N7—Cd1—N3 <sup>i</sup>                | 92.1(6) | C1—N9—Cd1                | 125.3(17) |
| <b>Cd-2</b> | N1—N2                | 1.23(3)   | C2—C3  | 1.34(2) | N7—Cd1—N4                             | 89.5(8) | C3—N9—Cd1                | 126.0(16) |
|             | N2—N3                | 1.06(3)   |        |         | N7—Cd1—N6 <sup>ii</sup>               | 86.6(8) | N2—N1—Cd1                | 125.6(15) |
|             | N4—N5                | 1.14(3)   |        |         | N9—Cd1—N1                             | 90.7(6) | N2—N3—Cd1 <sup>iii</sup> | 133.1(18) |
|             | N5—N6                | 1.17(3)   |        |         | N9—Cd1—N3 <sup>i</sup>                | 88.0(6) | N5—N4—Cd1                | 124.4(14) |
|             | N7—C4                | 1.34(4)   |        |         | N9—Cd1—N4                             | 93.6(8) | N5—N6—Cd1 <sup>iv</sup>  | 133.2(14) |
|             | N7—C6                | 1.44(3)   |        |         | N9—Cd1—N6 <sup>ii</sup>               | 90.3(8) | N1—N2—N3                 | 178(3)    |
|             | N8—C4                | 1.33(2)   |        |         |                                       |         | N4—N5—N6                 | 174(2)    |

Symmetry codes: (i)  $x-1/2, y-1/2, z$ ; (ii)  $x+1/2, y+1/2, z$ ; (iii)  $x+1/2, y+1/2, z$ ; (iv)  $x-1/2, y+1/2, z$ .

|             |                      |          |       |          |                                         |           |                         |           |
|-------------|----------------------|----------|-------|----------|-----------------------------------------|-----------|-------------------------|-----------|
|             | Mn1—N1               | 2.222(2) | N6—C4 | 1.312(3) | N1—Mn1—N1 <sup>i</sup>                  | 99.49(13) | N1—Mn1—N10              | 169.46(8) |
|             | Mn1—N3               | 2.239(2) | N6—C5 | 1.370(4) | N1—Mn1—N3                               | 93.56(9)  | N3—Mn1—N3 <sup>i</sup>  | 179.1(2)  |
|             | Mn1—N10              | 2.257(2) | N7—C4 | 1.336(4) | N1—Mn1—N3 <sup>i</sup>                  | 87.05(9)  | N6—Mn2—N5 <sup>ii</sup> | 171.28(8) |
|             | Mn2—N5 <sup>ii</sup> | 2.290(2) | N7—C6 | 1.355(5) | N1 <sup>i</sup> —Mn1—N10                | 89.26(9)  | N8—Mn2—N8 <sup>iv</sup> | 179.4(2)  |
|             | Mn2—N6               | 2.220(2) | C2—C3 | 1.353(4) | N3—Mn1—N10 <sup>i</sup>                 | 86.55(10) | C1—N1—Mn1               | 127.6(2)  |
|             | Mn2—N8               | 2.196(2) | C5—C6 | 1.346(4) | N3—Mn1—N10                              | 92.73(9)  | C2—N1—Mn1               | 127.7(2)  |
| <b>Mn-1</b> | N3—N4                | 1.160(3) |       |          | N10—Mn1—N10 <sup>i</sup>                | 82.70(13) | N4—N3—Mn1               | 154.6(2)  |
|             | N4—N5                | 1.175(3) |       |          | N5 <sup>ii</sup> —Mn2—N5 <sup>iii</sup> | 79.37(11) | N4—N5—Mn2 <sup>v</sup>  | 133.2(2)  |
|             | N8—N9                | 1.150(3) |       |          | N6—Mn2—N5 <sup>iii</sup>                | 92.12(8)  | C4—N6—Mn2               | 126.8(2)  |
|             | N9—N10               | 1.167(3) |       |          | N6—Mn2—N6 <sup>iv</sup>                 | 96.44(12) | C5—N6—Mn2               | 127.6(2)  |
|             | N1—C1                | 1.318(3) |       |          | N8—Mn2—N5 <sup>ii</sup>                 | 90.98(9)  | N9—N8—Mn2               | 166.3(2)  |
|             | N1—C2                | 1.372(3) |       |          | N8—Mn2—N5 <sup>iii</sup>                | 88.58(10) | N9—N10—Mn1              | 131.7(2)  |
|             | N2—C1                | 1.340(4) |       |          | N8—Mn2—N6 <sup>iv</sup>                 | 89.68(10) | N3—N4—N5                | 178.0(3)  |
|             | N2—C3                | 1.349(5) |       |          | N8—Mn2—N6                               | 90.70(9)  | N8—N9—N10               | 177.8(3)  |

Symmetry codes: (i)  $x-1/2, y-1/2, z$ ; (ii)  $x+1/2, y+1/2, z$ ; (iii)  $x+1/2, y+1/2, z$ ; (iv)  $x-1/2, y+1/2, z$ .

|             |                      |          |        |          |                                       |         |                          |          |
|-------------|----------------------|----------|--------|----------|---------------------------------------|---------|--------------------------|----------|
|             | Mn1—N1               | 2.262(6) | N8—C5  | 1.36(2)  | N1—Mn1—N4                             | 90.1(2) | N1—Mn1—N3 <sup>i</sup>   | 176.8(3) |
|             | Mn1—N3 <sup>i</sup>  | 2.247(7) | C5—C6  | 1.35(2)  | N3 <sup>i</sup> —Mn1—N4               | 88.0(3) | N4—Mn1—N6 <sup>ii</sup>  | 176.8(4) |
|             | Mn1—N4               | 2.259(7) | N9—C1  | 1.32(3)  | N6 <sup>ii</sup> —Mn1—N1              | 91.3(3) | N7—Mn1—N9                | 178.6(4) |
|             | Mn1—N6 <sup>ii</sup> | 2.255(8) | N9—C3  | 1.38(3)  | N6 <sup>ii</sup> —Mn1—N3 <sup>i</sup> | 92.0(3) | C4—N7—Mn1                | 125.6(8) |
| <b>Mn-2</b> | Mn1—N7               | 2.23(2)  | N10—C1 | 1.338(8) | N7—Mn1—N1                             | 90.6(3) | C6—N7—Mn1                | 128.9(8) |
|             | Mn1—N9               | 2.21(2)  | N10—C2 | 1.35(2)  | N7—Mn1—N3 <sup>i</sup>                | 92.0(3) | C1—N9—Mn1                | 127.2(6) |
|             | N1—N2                | 1.17(2)  | C2—C3  | 1.35(2)  | N7—Mn1—N4                             | 89.4(3) | C3—N9—Mn1                | 128.4(6) |
|             | N2—N3                | 1.17(2)  |        |          | N7—Mn1—N6 <sup>ii</sup>               | 87.8(3) | N2—N1—Mn1                | 135.6(7) |
|             | N4—N5                | 1.18(2)  |        |          | N9—Mn1—N1                             | 90.7(6) | N2—N3—Mn1 <sup>iii</sup> | 136.7(7) |

|                                                                                                                     |          |       |          |                         |           |                          |           |
|---------------------------------------------------------------------------------------------------------------------|----------|-------|----------|-------------------------|-----------|--------------------------|-----------|
| N5—N6                                                                                                               | 1.16(2)  |       |          | N9—Mn1—N3 <sup>i</sup>  | 87.6(3)   | N5—N4—Mn1                | 135.9(7)  |
| N7—C4                                                                                                               | 1.33(2)  |       |          | N9—Mn1—N4               | 92.0(3)   | N5—N6—Mn1 <sup>iv</sup>  | 136.5(7)  |
| N7—C6                                                                                                               | 1.37(2)  |       |          | N9—Mn1—N6 <sup>ii</sup> | 90.9(3)   | N1—N2—N3                 | 179.5(11) |
| N8—C4                                                                                                               | 1.341(9) |       |          |                         |           | N4—N5—N6                 | 179.1(11) |
| Symmetry codes: (i) $x-1/2, y-1/2, z$ ; (ii) $x+1/2, y+1/2, z$ ; (iii) $x+1/2, y+1/2, z$ ; (iv) $x-1/2, y+1/2, z$ . |          |       |          |                         |           |                          |           |
| Mn1—N1                                                                                                              | 2.224(3) | C1—C2 | 1.321(5) | N3—Mn1—N3 <sup>i</sup>  | 90.016(3) | N3—Mn1—N3 <sup>iii</sup> | 178.11(2) |
| Mn1—N3                                                                                                              | 2.259(3) | C2—H2 | 0.85(5)  | N3—Mn1—N3 <sup>ii</sup> | 90.015(3) | N1—Mn1—N1 <sup>i</sup>   | 180.0     |
| N3—N4                                                                                                               | 1.169(3) |       |          | N3—Mn1—N1               | 90.95(9)  | C1—N1—Mn1                | 127.6(2)  |
| N1—C1                                                                                                               | 1.346(5) |       |          | N3—Mn1—N1 <sup>i</sup>  | 89.05(9)  | N4—N3—Mn1                | 137.8(2)  |
| C1—H1                                                                                                               | 0.94(4)  |       |          |                         |           | N3—N4—N3 <sup>iv</sup>   | 179.9(7)  |
| Symmetry codes: (i) $y, -x+1, -z+1$ ; (ii) $-y+1, x, -z+1$ ; (iii) $-x+1, -y+1, z$ ; (iv) $-x+1, -y+2, z$ .         |          |       |          |                         |           |                          |           |

**Table S2.** Hydrogen bond parameters.

|                                                                                                                               | $D-H\cdots A$                               | $D-H$ (Å) | $H\cdots A$ (Å) | $D\cdots A$ (Å) | $D-H\cdots A$ (°) |
|-------------------------------------------------------------------------------------------------------------------------------|---------------------------------------------|-----------|-----------------|-----------------|-------------------|
| <b>Cd-1</b>                                                                                                                   | N8—H8 <sup>v</sup> ...N6 <sup>v</sup>       | 0.86      | 2.19            | 2.999(7)        | 158               |
|                                                                                                                               | C3—H3 <sup>vi</sup> ...N6 <sup>vi</sup>     | 0.93      | 2.69            | 3.568(7)        | 158               |
| Symmetry codes: (v) $x, y+1, z$ ; (vi) $-x, -y+1, -z$ .                                                                       |                                             |           |                 |                 |                   |
| <b>Cd-2</b>                                                                                                                   | N8—H8 <sup>v</sup> ...N4 <sup>v</sup>       | 0.86      | 2.10            | 2.944(18)       | 166               |
|                                                                                                                               | N10—H10 <sup>vi</sup> ...N1 <sup>vi</sup>   | 0.86      | 2.13            | 2.981(16)       | 172               |
|                                                                                                                               | C2—H2 <sup>vii</sup> ...N3 <sup>vii</sup>   | 0.93      | 2.52            | 3.42(2)         | 163               |
|                                                                                                                               | C5—H5 <sup>viii</sup> ...N6 <sup>viii</sup> | 0.93      | 2.57            | 3.48(2)         | 166               |
| Symmetry codes: (v) $x-1/2, -y+1/2, z-1/2$ ; (vi) $x, -y+1, z+1/2$ ; (vii) $x+1/2, -y+1/2, z+1/2$ ; (viii) $x, -y+1, z-1/2$ . |                                             |           |                 |                 |                   |
| <b>Mn-1</b>                                                                                                                   | N2—H2 <sup>vi</sup> ...N5 <sup>vi</sup>     | 0.86      | 2.34            | 3.152(3)        | 158               |
|                                                                                                                               | N7—H7 <sup>vii</sup> ...N10 <sup>vii</sup>  | 0.86      | 2.18            | 3.013(4)        | 162               |
| Symmetry codes: (vi) $x-1/2, y+1/2, z+1/2$ ; (vii) $x+1/2, y+1/2, z-1/2$ .                                                    |                                             |           |                 |                 |                   |
| <b>Mn-2</b>                                                                                                                   | N8—H8 <sup>v</sup> ...N4 <sup>v</sup>       | 0.86      | 2.17            | 3.009(9)        | 167               |
|                                                                                                                               | N10—H10 <sup>vi</sup> ...N1 <sup>vi</sup>   | 0.86      | 2.17            | 3.019(9)        | 168               |
|                                                                                                                               | C2—H2 <sup>vii</sup> ...N3 <sup>vii</sup>   | 0.93      | 2.54            | 3.437(10)       | 161               |
|                                                                                                                               | C5—H5 <sup>viii</sup> ...N6 <sup>viii</sup> | 0.93      | 2.52            | 3.420(12)       | 163               |
| Symmetry codes: (v) $x-1/2, -y+1/2, z-1/2$ ; (vi) $x, -y+1, z+1/2$ ; (vii) $x+1/2, -y+1/2, z+1/2$ ; (viii) $x, -y+1, z-1/2$ . |                                             |           |                 |                 |                   |
| <b>Mn-2 HT</b>                                                                                                                | N2—H2 <sup>ix</sup> ...N3 <sup>ix</sup>     | 0.85      | 2.41(5)         | 3.220(5)        | 158(4)            |
|                                                                                                                               | C2—H2 <sup>ix</sup> ...N3 <sup>ix</sup>     | 0.85      | 2.41(5)         | 3.220(5)        | 158(4)            |
| Symmetry codes: (ix) $x-1/2, -y+3/2, -z+1/2$ .                                                                                |                                             |           |                 |                 |                   |

**Table S3.** The Raman and IR modes (in  $\text{cm}^{-1}$ ) of Cd-1, Cd-2 and Mn-2 observed at RT and their proposed assignment.

| IR          | Raman       | IR          | Raman       | IR          | Raman       | Assignment                                                               |
|-------------|-------------|-------------|-------------|-------------|-------------|--------------------------------------------------------------------------|
| <b>Cd-1</b> | <b>Cd-1</b> | <b>Cd-2</b> | <b>Cd-2</b> | <b>Mn-2</b> | <b>Mn-2</b> |                                                                          |
| 3556sh      |             |             |             | 3448vw      |             | $\nu_{\text{as}}(\nu_3)\text{N}_3^- + \nu_{\text{s}}(\nu_1)\text{N}_3^-$ |

|        |        |        |        |        |        |                                                         |
|--------|--------|--------|--------|--------|--------|---------------------------------------------------------|
|        | 3307vw | 3427vw |        | 3412w  |        | $\nu_{as}(\nu_3)N_3^- + \nu_s(\nu_1)N_3^-$              |
| 3349w  |        | 3397vw |        |        |        | $\nu NH, \nu_{as}(\nu_3)N_3^- +$<br>$\nu_s(\nu_1)N_3^-$ |
| 3308m  |        | 3378vw |        | 3370vw |        | $\nu NH$                                                |
| 3235m  |        | 3325vw |        |        |        | $\nu NH$                                                |
| 3161m  | 3161m  |        |        | 3169m  |        | $\nu NH$                                                |
|        | 3148w  |        |        |        |        | $\nu NH$                                                |
| 3139m  | 3138m  | 3141m  | 3146m  | 3146m  | 3151w  | $\nu CH$                                                |
| 3128m  | 3128w  | 3127m  | 3128w  | 3130m  | 3131w  | $\nu CH$                                                |
| 3057w  | 3060vw | 3059w  | 3060vw | 3058w  | 3059vw | overtone                                                |
| 2945w  |        | 2945w  | 2947vw | 2945w  | 2946vw | overtone                                                |
| 2838w  |        | 2838w  | 2841vw | 2838w  | 2850vw | overtone                                                |
| 2791vw |        | 2791vw |        | 2787vw |        | combination                                             |
| 2704vw |        | 2705vw |        | 2699vw |        | combination                                             |
| 2596vw |        | 2593vw |        | 2589vw |        | combination                                             |
|        | 2106vw |        |        | 2114sh |        | $\nu_{as}(\nu_3)N_3^-$                                  |
| 2088sh | 2089w  |        |        | 2078vs | 2072vw | $\nu_{as}(\nu_3)N_3^-$                                  |
| 2059vs |        | 2056vs | 2052vw | 2062sh |        | $\nu_{as}(\nu_3)N_3^-$                                  |
| 2035vs |        | 2045sh |        |        |        | $\nu_{as}(\nu_3)N_3^-$                                  |
|        |        | 2016s  |        | 2006m  |        | $\nu_{as}(\nu_3)N_3^-$                                  |
| 1694vw |        | 1718vw |        | 1713vw |        | $\gamma NH$                                             |
| 1679vw |        | 1644vw |        | 1672vw |        | $\gamma NH$                                             |
| 1605vw |        | 1618vw |        | 1637vw |        | $\gamma NH$                                             |
| 1535m  | 1535w  | 1536m  | 1536w  | 1534m  | 1535w  | $\nu Ring$                                              |
| 1504w  | 1506vw | 1501w  | 1503vw | 1502w  | 1502w  | $\nu Ring$                                              |
| 1488w  | 1487vw | 1489w  | 1489vw | 1488m  | 1488w  | $\nu Ring$                                              |
| 1433w  | 1434w  | 1431w  | 1436w  | 1432sh | 1435sh | $\delta NH, \nu Ring$                                   |
|        | 1427sh | 1425w  | 1426w  | 1423w  | 1425w  | $\delta NH, \nu Ring$                                   |
| 1384w  |        | 1384vw |        |        |        | combination                                             |
|        | 1355m  | 1353vw | 1354vs | 1357w  | 1358vs | $\nu_s(\nu_1)N_3^-$                                     |
| 1330m  | 1338vs | 1328m  | 1328m  | 1325m  | 1326w  | $\nu_s(\nu_1)N_3^-$                                     |
|        | 1291vw |        | 1291vw |        |        | $\delta CH$                                             |
|        | 1272vw |        |        |        | 1276vw | $\delta CH$                                             |
| 1261w  | 1257m  | 1260m  | 1258m  | 1258m  | 1255m  | $\delta CH$                                             |
|        | 1224vw | 1243vw | 1243vw | 1239w  | 1238vw | $\delta CH$                                             |
|        | 1178w  |        | 1177m  |        | 1175m  | $\delta CH, \delta Ring$                                |
| 1172w  | 1171m  | 1169w  | 1134w  | 1164w  |        | $\delta CH, \delta Ring$                                |
| 1136w  | 1134m  | 1138w  |        | 1135w  | 1132w  | $\delta CH, \delta Ring$                                |
| 1128w  |        |        |        |        |        | $\delta CH, \delta Ring$                                |
| 1108w  | 1105w  |        |        |        |        | $\delta CH, \delta Ring$                                |
| 1098w  | 1099w  | 1099w  | 1100w  | 1097w  | 1098w  | $\delta CH, \delta Ring$                                |
| 1067m  | 1068w  | 1069s  | 108w   | 1066s  | 1066vw | $\delta Ring$                                           |
| 939w   | 940w   | 941w   | 940w   | 940w   | 938vw  | $\gamma CH$                                             |
| 921w   | 921w   | 915vw  | 917w   | 916w   | 917vw  | $\gamma CH$                                             |
|        |        | 883vw  | 886vw  | 879vw  | 882vw  | $\gamma CH, \gamma NH$                                  |

|                                                                                                                                                                                                                                                                                                                                                                                                                                                                                                                                                |       |       |       |       |       |                                         |
|------------------------------------------------------------------------------------------------------------------------------------------------------------------------------------------------------------------------------------------------------------------------------------------------------------------------------------------------------------------------------------------------------------------------------------------------------------------------------------------------------------------------------------------------|-------|-------|-------|-------|-------|-----------------------------------------|
|                                                                                                                                                                                                                                                                                                                                                                                                                                                                                                                                                | 856vw | 873vw |       | 871vw |       | $\gamma$ NH, $\delta$ Ring              |
| 837w                                                                                                                                                                                                                                                                                                                                                                                                                                                                                                                                           | 839vw | 841sh | 835vw | 840w  | 837vw | $\gamma$ NH, $\delta$ Ring              |
|                                                                                                                                                                                                                                                                                                                                                                                                                                                                                                                                                |       | 818w  |       | 804w  |       | $\gamma$ NH                             |
| 780w                                                                                                                                                                                                                                                                                                                                                                                                                                                                                                                                           |       | 780m  |       | 776m  |       | $\gamma$ NH                             |
| 757w                                                                                                                                                                                                                                                                                                                                                                                                                                                                                                                                           | 756vw | 757sh |       |       |       | $\gamma$ NH                             |
| 732m                                                                                                                                                                                                                                                                                                                                                                                                                                                                                                                                           |       |       |       |       |       | $\gamma$ NH                             |
| 649s                                                                                                                                                                                                                                                                                                                                                                                                                                                                                                                                           | 653vw | 654s  | 655vw | 657s  | 658vw | $\delta(\nu_2)\text{N}_3^-$             |
| 637w                                                                                                                                                                                                                                                                                                                                                                                                                                                                                                                                           |       |       |       | 640m  |       | $\delta(\nu_2)\text{N}_3^-$             |
| 618w                                                                                                                                                                                                                                                                                                                                                                                                                                                                                                                                           | 619vw | 623m  | 623vw | 619m  | 620vw | $\delta(\nu_2)\text{N}_3^-$             |
| 612s                                                                                                                                                                                                                                                                                                                                                                                                                                                                                                                                           |       | 613m  |       | 610m  |       | $\delta(\nu_2)\text{N}_3^-$             |
|                                                                                                                                                                                                                                                                                                                                                                                                                                                                                                                                                | 265vw |       | 263w  | 259vw |       | T'(Mn)                                  |
|                                                                                                                                                                                                                                                                                                                                                                                                                                                                                                                                                | 224sh | 231sh | 231m  | 234m  |       | LN <sub>3</sub> <sup>-</sup> T'(Mn)     |
|                                                                                                                                                                                                                                                                                                                                                                                                                                                                                                                                                | 214m  | 215m  | 210m  |       | 213m  | LN <sub>3</sub> <sup>-</sup> LIm        |
|                                                                                                                                                                                                                                                                                                                                                                                                                                                                                                                                                | 179sh |       |       |       | 184sh | T'(Mn)                                  |
|                                                                                                                                                                                                                                                                                                                                                                                                                                                                                                                                                |       |       |       |       | 180m  | T'(Mn)                                  |
|                                                                                                                                                                                                                                                                                                                                                                                                                                                                                                                                                | 173m  |       | 168s  | 172m  | 172m  | T'N <sub>3</sub> <sup>-</sup> LIm       |
|                                                                                                                                                                                                                                                                                                                                                                                                                                                                                                                                                | 139s  | 155m  | 152m  | 164sh | 148w  | T'N <sub>3</sub> <sup>-</sup>           |
|                                                                                                                                                                                                                                                                                                                                                                                                                                                                                                                                                | 116m  |       | 124m  | 132w  | 120m  | T'N <sub>3</sub> <sup>-</sup> T'Im T'Cd |
|                                                                                                                                                                                                                                                                                                                                                                                                                                                                                                                                                |       |       | 109m  |       |       | T'Cd                                    |
| <p>Key: s-very strong, s-strong, m-medium, w-weak, vw-very weak; <math>\nu_s</math>-symmetric stretching, <math>\nu_{as}</math>-asymmetric stretching, <math>\nu_s</math>-symmetric stretching, <math>\nu_{as}</math>-asymmetric stretching, <math>\delta_{as}</math>-asymmetric bending, <math>\delta_s</math>, <math>\delta</math>-symmetric bending (scissoring), <math>\gamma</math> – out-of-plane bending, <math>\rho</math>-rocking, <math>\omega</math>-wagging, <math>\tau</math>-twisting (torsion), T-translation, L-libration.</p> |       |       |       |       |       |                                         |

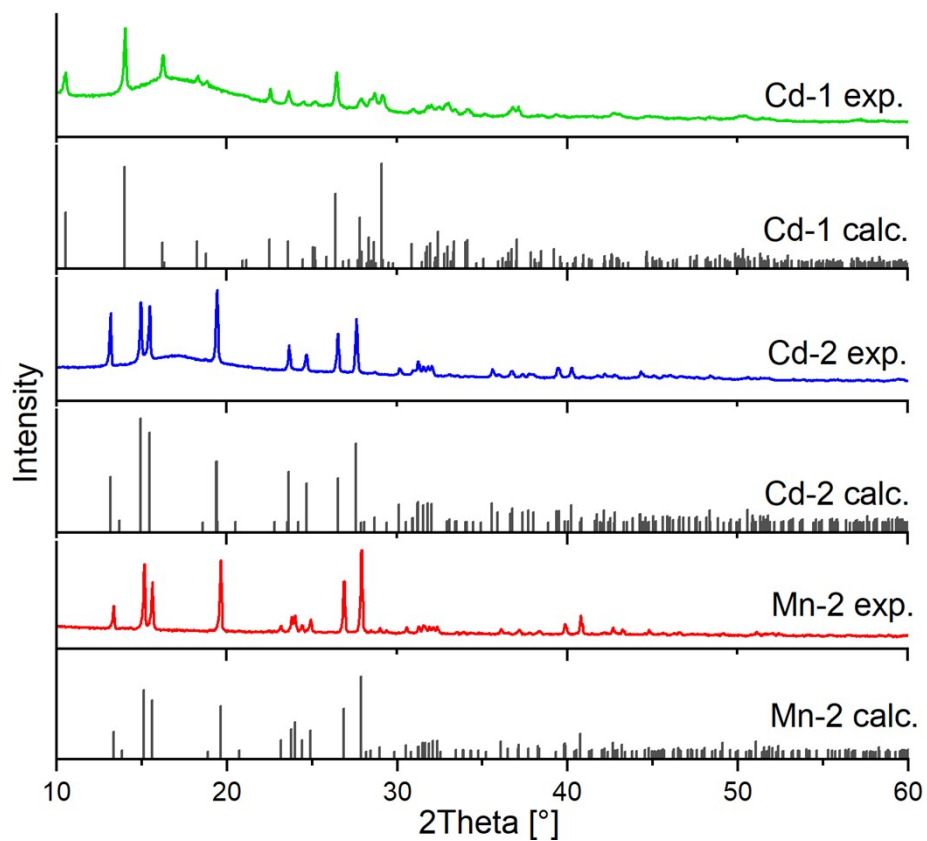

**Fig. S1.** PXRD patterns of Cd-1, Mn-1 and Mn-2.

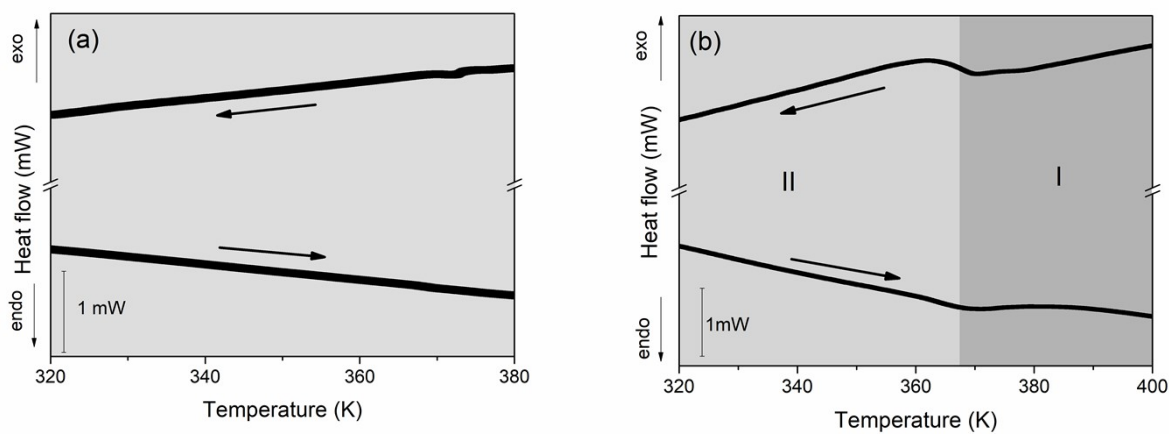

**Fig. S2.** DSC traces of (a) Cd-2 and (b) Mn-2 measured in a heating and cooling run.

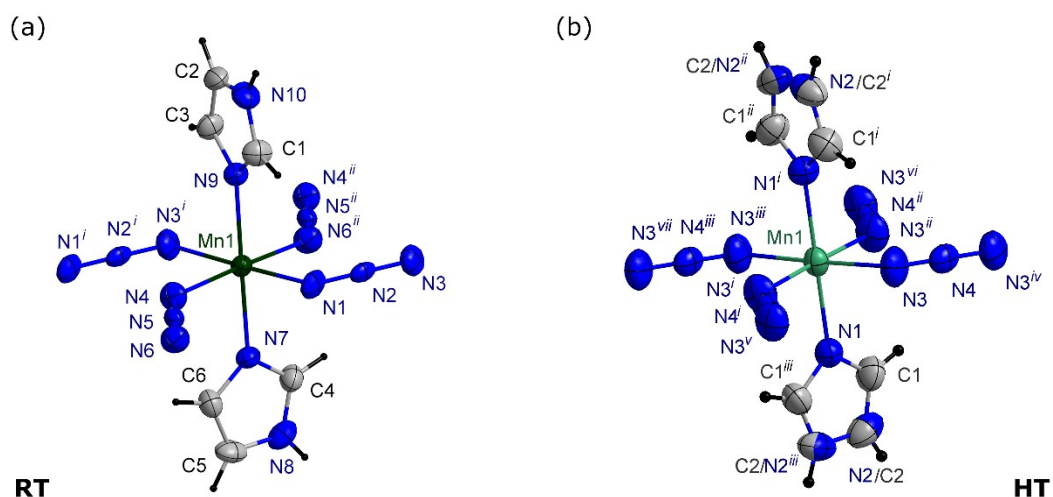

**Fig. S3.** The comparison of the asymmetric unit of **Mn-2** with the part that complete octahedral coordination of the Mn ion presented with atom numbering scheme for (a) RT (symmetry codes: (i)  $x-1/2, y-1/2, z$ ; (ii)  $x+1/2, y+1/2, z$ ) and (b) HT phase (symmetry codes: (i)  $y, -x+1, -z+1$ ; (ii)  $-y+1, x, -z+1$ ; (iii)  $-x+1, -y+1, z$ ; (iv)  $-x+1, -y+2, z$ ; (v)  $-y+2, y, -z+1$ ; (vi)  $y-1, -x+1, -z+1$ ; (vii)  $x, y-1, z$ ). All non-hydrogen atoms are shown in ellipsoid representation at 50% probability level.

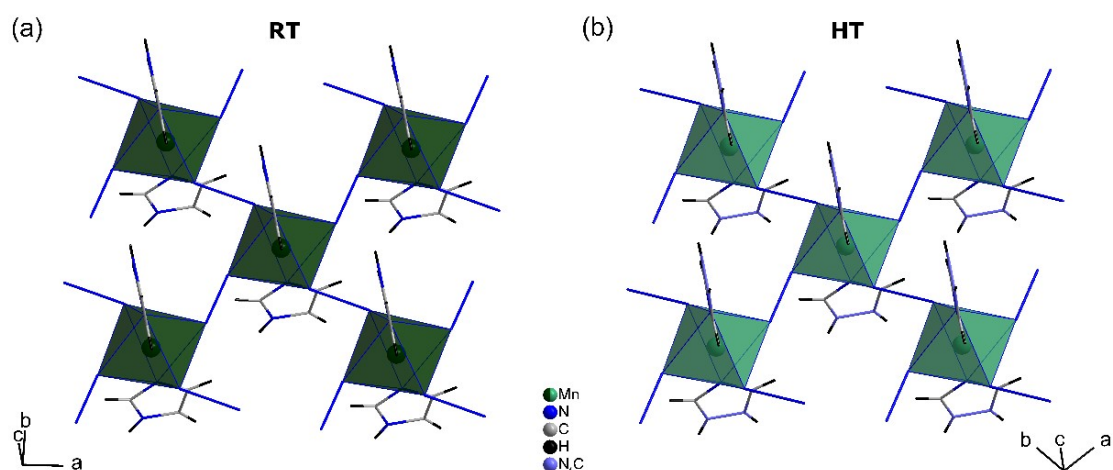

**Fig. S4.** The view at single  $ab$ -planes of **Mn-2** structures showing azides anions linking Mn octahedra in two different phases: (a) RT and (b) HT phase.

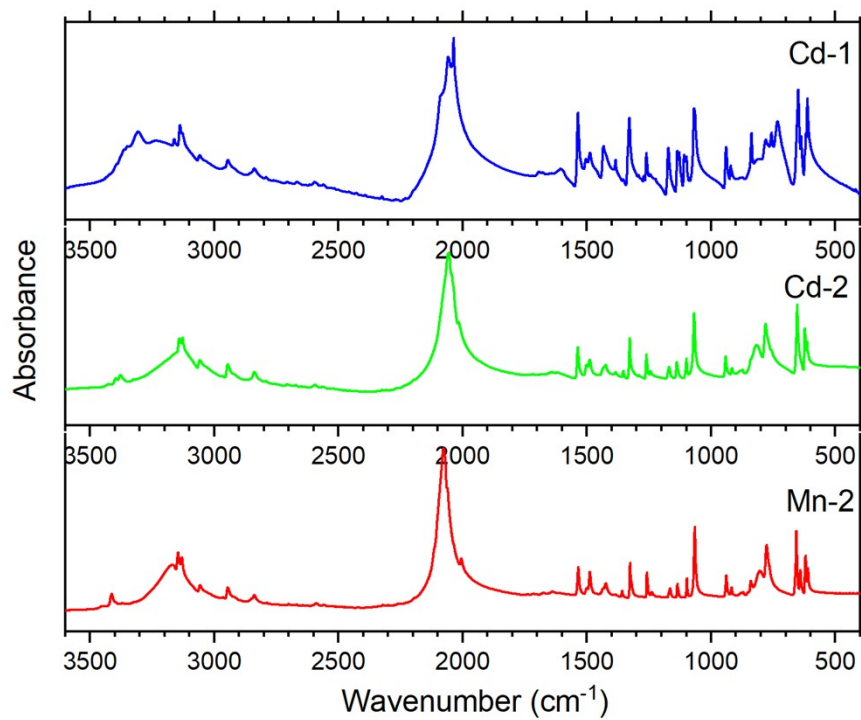

**Fig. S5.** The IR spectra of metal-imidazole azides.

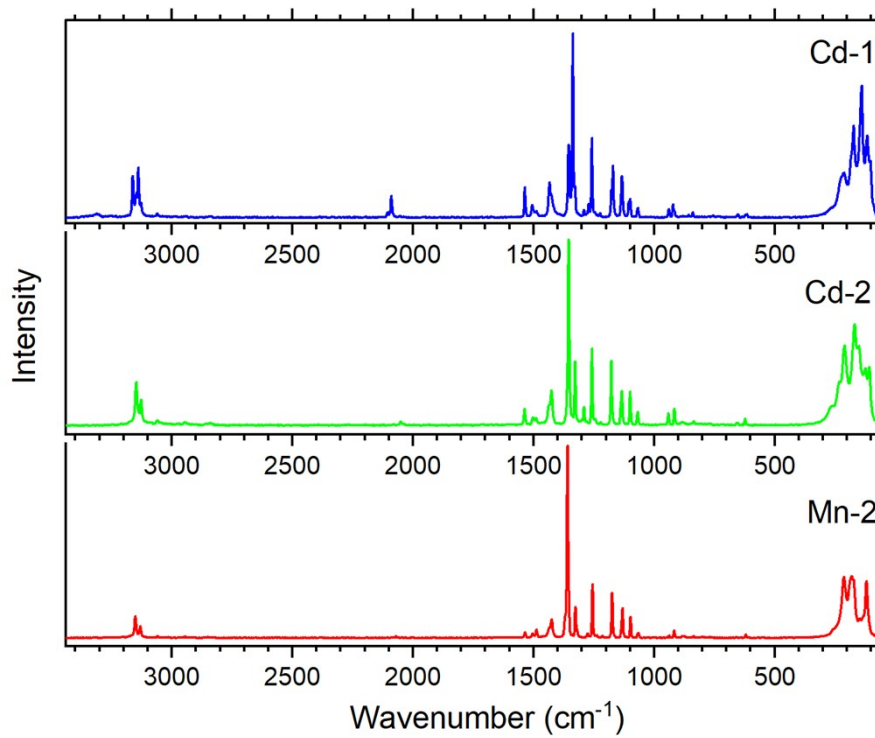

**Fig. S6.** The Raman spectra of metal-imidazole azides.



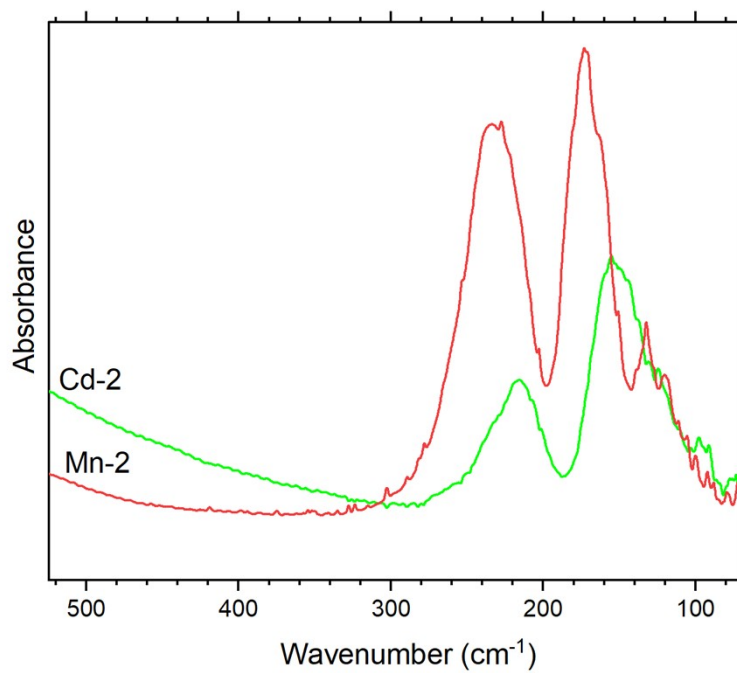

**Fig. S7.** The far- IR spectra of metal-imidazole azides.

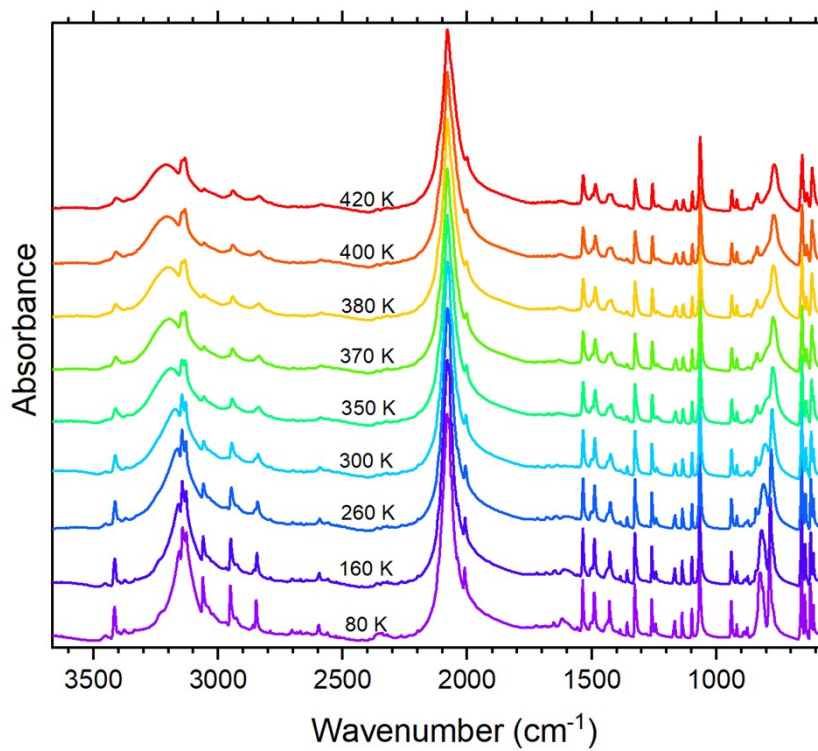

**Fig. S8.** The IR spectra of Mn-2.

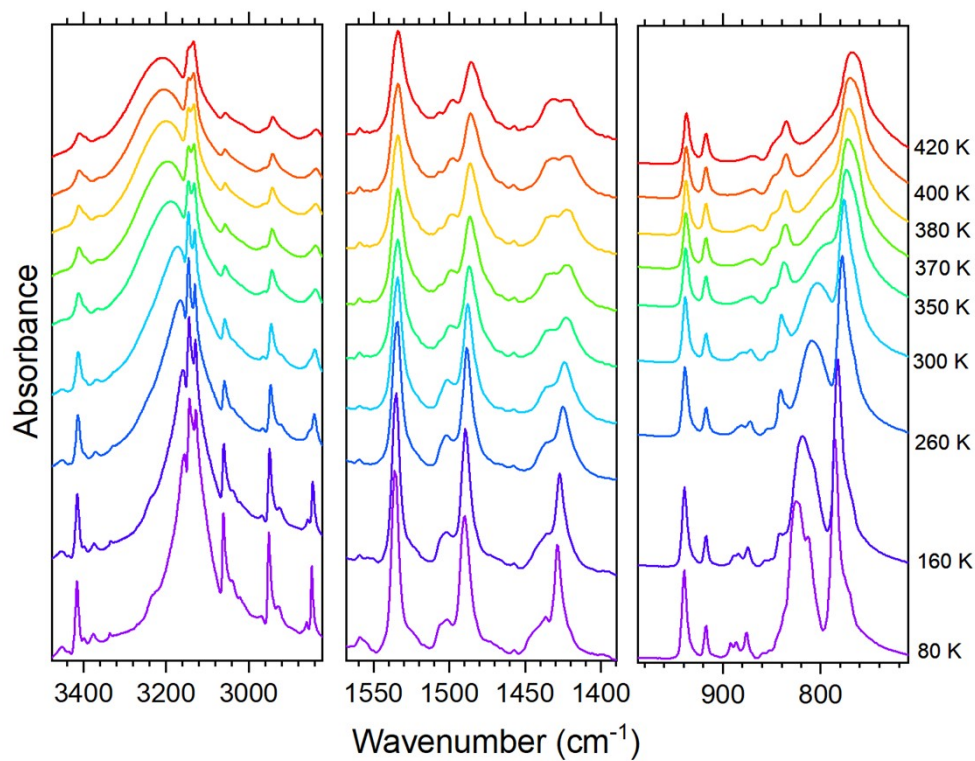

**Fig. S9.** The details of IR spectra of Mn-2.

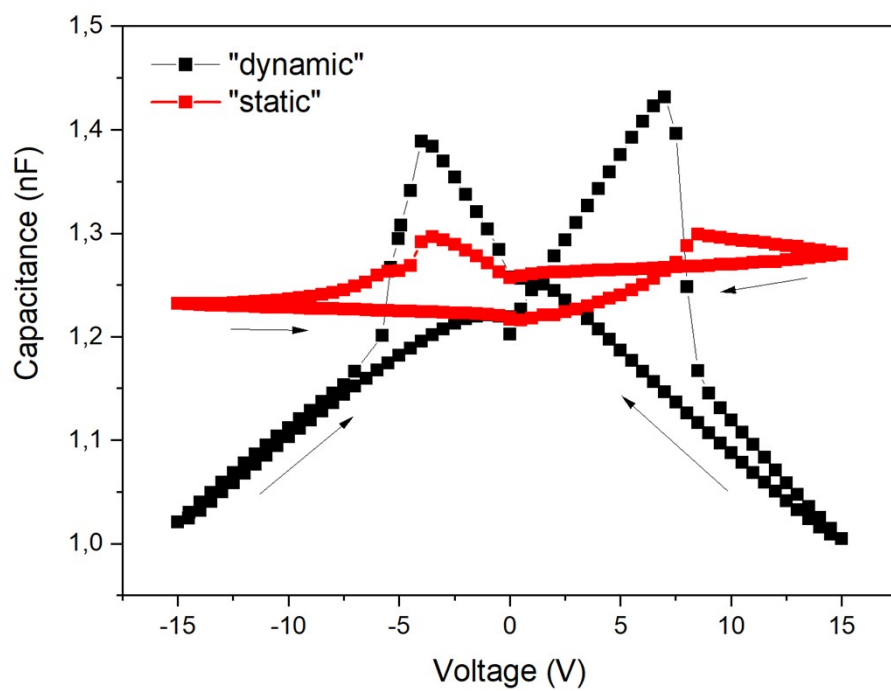

**Fig. S10.** The C-V characteristics of the PZT thin film.

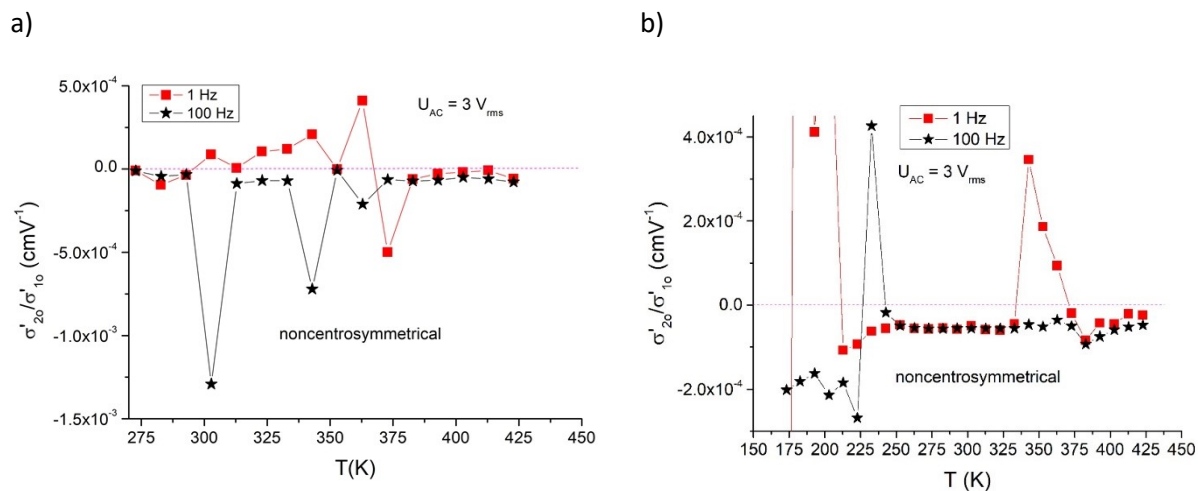

**Fig. S11.** The ratio of the second-order conductivity coefficient to the linear conductivity versus temperature at frequencies of 1 and 100 Hz for samples: (a) Mn-2 and (b) Cd-2.

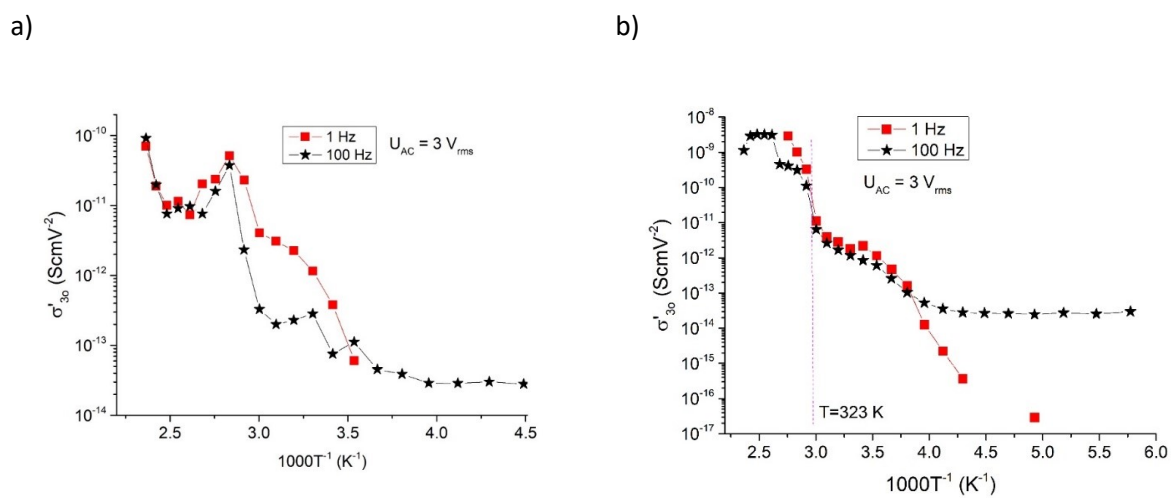

**Fig. S12.** The third-order conductivity coefficient versus temperature measured at frequencies of 1 and 100 Hz for samples: (a) Mn-2 and (b) Cd-2.
